# Supplementary material for: Ecotoxicological Properties of Pure and Phosphorus-Containing Graphene Oxide Bidimensional Sheets in Daphnia magna
Source: MDPI journal article supplement (doi:10.3390/toxics12040252), 2024-03-29
Supplement: s1 [file s1]

SUPPLEMENTARY MATERIAL

# Supplementary Material for Ecotoxicological Properties of Pure and Phosphorus-Containing Graphene Oxide Bidimensional Sheets in *Daphnia magna*

F. Mendoza-Villa <sup>1</sup>, Noemi-Raquel Checca-Huaman <sup>2</sup>, Tainara L. G. Costa <sup>3</sup>, Jair C. C. Freitas <sup>3</sup> and Juan A. Ramos-Guivar <sup>1,\*</sup>

<sup>1</sup> Grupo de Investigación de Nanotecnología Aplicada Para la Biorremediación Ambiental, Energía, Biomedicina y Agricultura (NANOTECH), Facultad de Ciencias Físicas, Universidad Nacional Mayor de San Marcos, Av. Venezuela Cdra 34 S/N, Ciudad Universitaria, Lima 15081, Peru; freddy.mendoza1@unmsm.edu.pe

<sup>2</sup> Centro Brasileiro de Pesquisas Físicas, Rio de Janeiro 22290-180, RJ, Brazil; nomifsc@cbpf.br

<sup>3</sup> Laboratory of Carbon and Ceramic Materials, Department of Physics, Federal University of Espírito Santo, Vitória 29075-910, ES, Brazil; tainara.costa@edu.ufes.br (T.L.G.C.); jairccfreitas@yahoo.com.br (J.C.C.F.)

Correspondence: juan.ramos5@unmsm.edu.pe

## Supplementary Figures

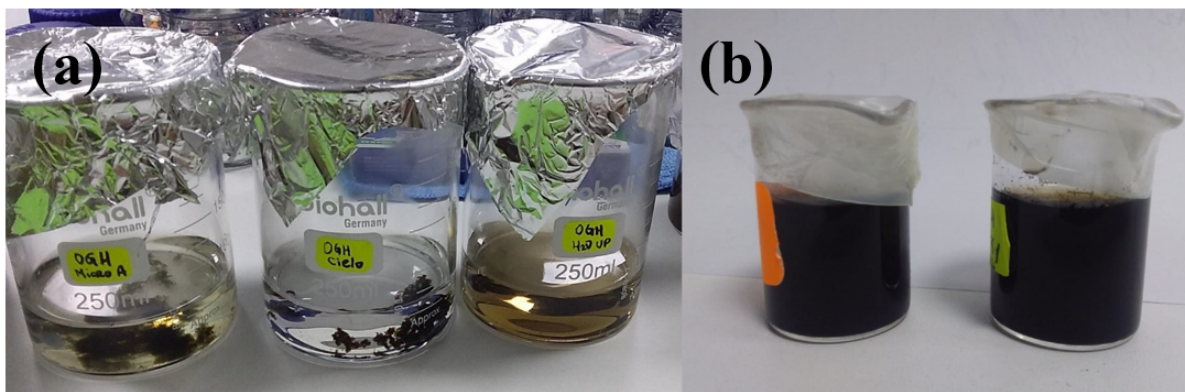

Figure S1: (a) Dispersion of GO in different types of water (left: microalgae water, middle: commercial drinking water, right: ultrapure water), (b) Dispersion at a concentration of 1500 mg L<sup>-1</sup> of GOP (orange label) and GO (green label).

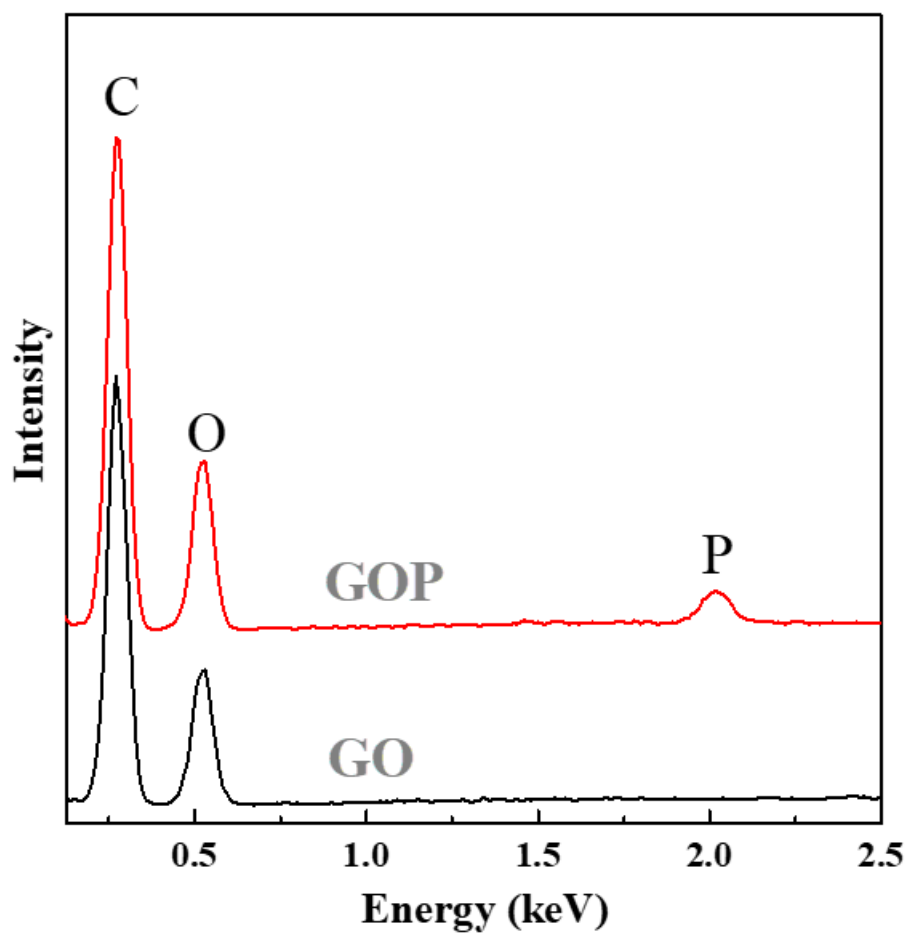

Figure S2: EDS spectrum for GO and GOP samples.
