# Supplementary figures and images for: Ecotoxicological Properties of Pure and Phosphorus-Containing Graphene Oxide Bidimensional Sheets in Daphnia magna
Source: MDPI journal article supplement (doi:10.3390/toxics12040252), 2024-03-29

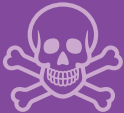

*toxics*

Supplement: s1 [file s1]

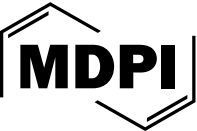

Supplement: s1 [file s1]
